# Supplementary material for: A ratiometric two-photon fluorescent probe for the quantification of nitroreductase in hypoxic neurons
Source: Royal Society of Chemistry journal article supplement (doi:10.1039/d4cc06218c), 2024-12-04
Supplement: d4cc06218c1.pdf [file d4cc06218c1.pdf]

1  
2  
3  
4  
5  
6  
7  
8  
9  
10  
11  
12  
13  
14  
15  
16  
17  
18  
19  
20  
21  
22

## Supplementary Information

*for*

### **A ratiometric two-photon fluorescent probe for quantification of nitroreductase in hypoxic neurons**

Zhiquan Tang, Hong Huang,\* Yuanyuan Yao, Shumei Gao, Bingyong Lin, Qianshou

Zong, Wanpeng Hu,\* Jianguo Xu, Yangang Wang, Longhua Guo\*

College of Biological, Chemical Science and Engineering, Jiaxing University, Jiaxing

314001, China.

\*Corresponding author:

huangho17@zjxu.edu.cn, huangho17@163.com (H. Huang);

hu688@zjxu.edu.cn (W. Hu);

guolh@zjxu.edu.cn (L. Guo).

## 1 **Experimental section**

### 2 **Reagents and Chemicals**

3 All chemicals were purchased from commercial suppliers and without further  
4 purification. 4-Nitro-1,8-naphthalicanhydride, 4-amino-1,8-naphthalicanhydride, 3-  
5 amino-1-propanol, triethylamine, 7-(diethylamino)-2-oxo-2H-chromene-3-  
6 carbaldehyde, 4-methylpyridine, tribromophosphine, NaI were purchased from  
7 Adamas-Beta Co., Ltd. (Shanghai, China). Petroleum ether (PE), ethyl acetate (EA),  
8 dichloromethane (DCM), methanol (MeOH) and N, N-dimethylformamide (DMF)  
9 were bought from General Reagents Co., Ltd. (Shanghai, China). Nitro reductase  
10 (NTR), monoamine oxidase-A (MAO-A), monoamine oxidase-B (MAO-B), protein  
11 tyrosine phosphatase (PTP), gamma-glutamyl transferase (GCT), bovine serum  
12 albumin (BSA), human serum albumin (HSA), tyrosinase (TYR) and alkaline  
13 phosphatase (ALP) were purchased from Aladdin Chemistry Co. Ltd. (China).  
14 Phosphate buffer solution (PBS, pH 7.4) with concentration of 0.1 M was prepared from  
15  $\text{KH}_2\text{PO}_4$ ,  $\text{K}_2\text{HPO}_4 \cdot 3\text{H}_2\text{O}$  and KCl. All aqueous solutions were prepared with Milli-Q  
16 water (18.2 M  $\Omega$  cm, Millipore) and all chemicals were used as purchase without further  
17 purification.

### 18 **Instruments**

19 The  $^1\text{H}$  NMR and  $^{13}\text{C}$  NMR spectra were obtained from a 500 MHz Bruker NMR  
20 spectrometer (Bruker, Germany). The mass spectra were detected by a Bruker ESI time-  
21 of-flight MS system (Bruker, Germany). The fluorescence spectrum and the UV-vis  
22 absorption spectrum were recorded by using a Hitachi F-4500 fluorescence

1 spectrometer (Hitachi, Japan) and a Hitachi UH-5300 spectrometer (Hitachi, Japan),  
2 respectively. The fluorescence imaging was obtained from a Leica TCS SP8 confocal  
3 laser scanning microscope (Leica, Germany) equipped with two-photon laser  
4 (Chameleon Ultra II, Coherent, UK). The cytotoxicity assays were measured by  
5 Varioskan LUX multimode microplate reader (Thermo Fisher scientific, USA). The  
6 apoptosis assay was carried out by a FACS Calibur flow cytometry (Becton, Dickinson  
7 and Company, USA).

## 8 **Cell culture**

9 The acquisition and cultivation of neurons were conducted as a previous reported  
10 procedure. Newborn within 24 hours C57BL/6 wild-type mice were anesthetized by  
11 halothane, and then their brains were removed quickly and put in Hanks' balanced salt  
12 solution (HBSS, free  $Mg^{2+}$  and  $Ca^{2+}$ ) at 0 °C. Tissues of the cortex were stripped out  
13 and then incubated with papain at 37 °C for 12 min, after that they were dispersed into  
14 poly-d-lysine-coated 35 mm Petri dishes at a density of  $1 \times 10^6$  cells/dish. The neurons  
15 were cultured with neurobasal medium containing L-glutamine and B27 and the  
16 medium was changed three times a week. After maintained at 37 °C in a humidified  
17 atmosphere with 5% CO<sub>2</sub> for a week, the neurons could be used for imaging. All  
18 experiments involving mice were carried out in accordance with the principles and  
19 guidelines approved by the Animal Care and Use Committee of Jiaying University.

## 20 **Cytotoxicity and apoptosis assay**

21 The cytotoxicity assays were measured by 3-(4,5-dimethylthiazol-2-yl)-2,5-  
22 diphenyltetrazolium bromide (MTT). Neurons in 96-well plates were incubated with

1 different concentrations of the **IFRP** probe (0, 10, 20, 30 and 40  $\mu\text{M}$ ) and cultured for  
2 12 and 24 h. Then, the neurons in each well were treated with 20  $\mu\text{L}$ , 5 mg/mL MTT  
3 solution and further continuously incubated for 4 h at 37  $^{\circ}\text{C}$ . After that, MTT solution  
4 was removed and 100  $\mu\text{L}$  Formazan solvent was added to each well until the crystalline  
5 formazan products were dissolved. Absorbance was next measured at 490 nm in a  
6 Varioskan LUX multimode microplate reader (Thermo Fisher scientific, USA). Cell  
7 viability was defined as the ratio of absorbance in the experimental groups to that in the  
8 blank control groups. For apoptosis assays, the Annexin V-FITC Apoptosis Detection  
9 Kit was used to determine the degree of cell apoptosis. Neurons were incubated with  
10 the **IFRP** probe (0, 10, 30 and 50  $\mu\text{M}$ ) for 24 h, then they were collected with the help  
11 of EDTA-free trypsin and washed by 5 mL PBS for three times. Moreover, PBS was  
12 removed by centrifugation of 1000 rpm for 5 min and neurons were incubated with 195  
13  $\mu\text{L}$  binding buffer of Annexin V-FITC, 5  $\mu\text{L}$  Annexin V-FITC and 10  $\mu\text{L}$  Propidium  
14 Iodide (PI) at room temperature in the dark for 30 min. After these procedures, neurons  
15 were used for the flow cytometry and detected at an excitation wavelength of 488 nm.

#### 16 **NTR analysis in cell lysates**

17 The cultured neuronal cells were subjected to centrifugal treatment to remove the  
18 nutrient solutions and then dispersed in normal saline. Pulsed sonication, with a cycle  
19 of 2 seconds on and 2 seconds off, was performed at a power out of 600 W for 2 min to  
20 break the cells (Scientz-IID, Ningbo Scientz Biotechnology Co., Ltd., China).  
21 Subsequently, the neuronal cell lysates were clarified through a centrifugation process  
22 at 10,000 rpm at 4  $^{\circ}\text{C}$  for 5 min and stored at -20  $^{\circ}\text{C}$  for further use. The procedure for

1 NTR analysis in neuronal cell lysates was identical to that in PBS solution.

## 2 **Subcellular imaging**

3 The subcellular localization of **IFRP** was studied through colocalization imaging  
4 experiments, in which neurons labelled with **IFRP** (5.0  $\mu$ M, labeling time: 0.5 h) were  
5 further labelled with MitoLite blue FX490 (5.0  $\mu$ M) for additional 0.5 h. Following  
6 staining, neurons were gently washed thrice with PBS before conducting confocal  
7 fluorescence imaging experiments. MitoLite blue FX490 was excited using a 405 nm  
8 laser, and emission signals were collected within the 420-490 nm wavelength range. As  
9 for **IFRP**, fluorescence was excited at 800 nm, and images were collected within 470-  
10 550 nm (F<sub>515</sub> channel) and 600-700 nm (F<sub>640</sub> channel) wavelength range.

11

12

1

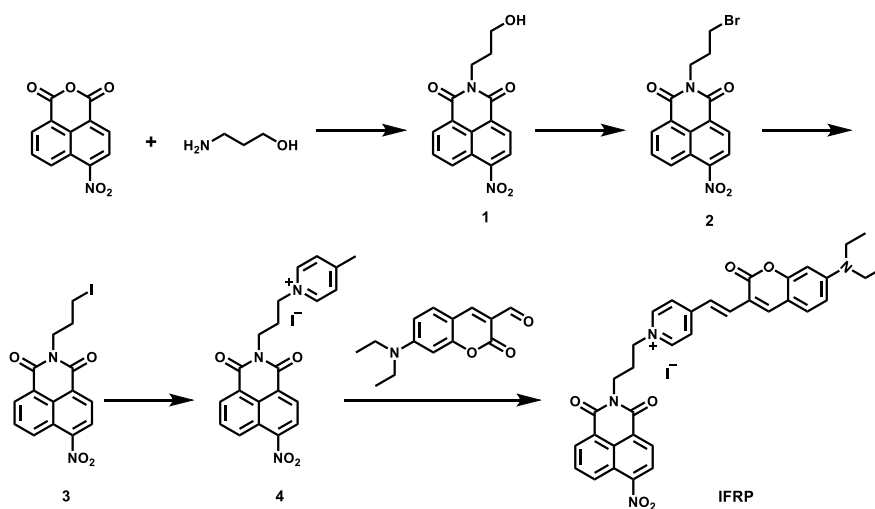

2

3

**Scheme S1.** The synthesis procedures of **IFRP**.

4 Synthesis of Compound **1**: 4-Nitro-1,8-naphthalic anhydride (486 mg, 2.0 mmol) and 3-

5 amino-1-propanol (300 mg, 4.0 mmol) were dissolved in ethanol (20 mL). The reaction

6 mixture was stirred and refluxed for 3 h under a nitrogen atmosphere, the resulting

7 mixture was evaporated to dryness. After the solvent was evaporated under reduced

8 pressure, the crude product was purified by silica gel column chromatography using

9 PE/EA (20:1, v/v) as eluent to get Compound **1** as brown solid.  $^1\text{H}$  NMR (500 MHz,

10 298 K,  $\text{DMSO-}d_6$ )  $\delta$  8.65-8.63 (d,  $J = 10.0$  Hz, 1H), 8.57-8.49 (m, 3H), 8.06-8.03 (m,

11 1H), 4.53-4.51 (m, 1H), 4.11-4.08 (m, 2H), 3.53-3.50 (m, 2H), 1.83-1.77 (m, 2H).  $^{13}\text{C}$

12 NMR (125 MHz, 298 K,  $\text{DMSO-}d_6$ )  $\delta$  163.33, 162.53, 149.44, 132.04, 130.51, 129.96,

13 129.09, 128.68, 127.06, 124.68, 123.17, 123.11, 59.43, 40.49, 40.32, 40.16, 39.99,

14 39.82, 39.65, 39.49, 38.44, 31.21. HR-MS (ESI):  $m/z$  calcd for  $\text{C}_{15}\text{H}_{12}\text{N}_2\text{NaO}_5$

15  $[\text{M}+\text{Na}]^+$ : 323.0638; found: 323.0646.

16

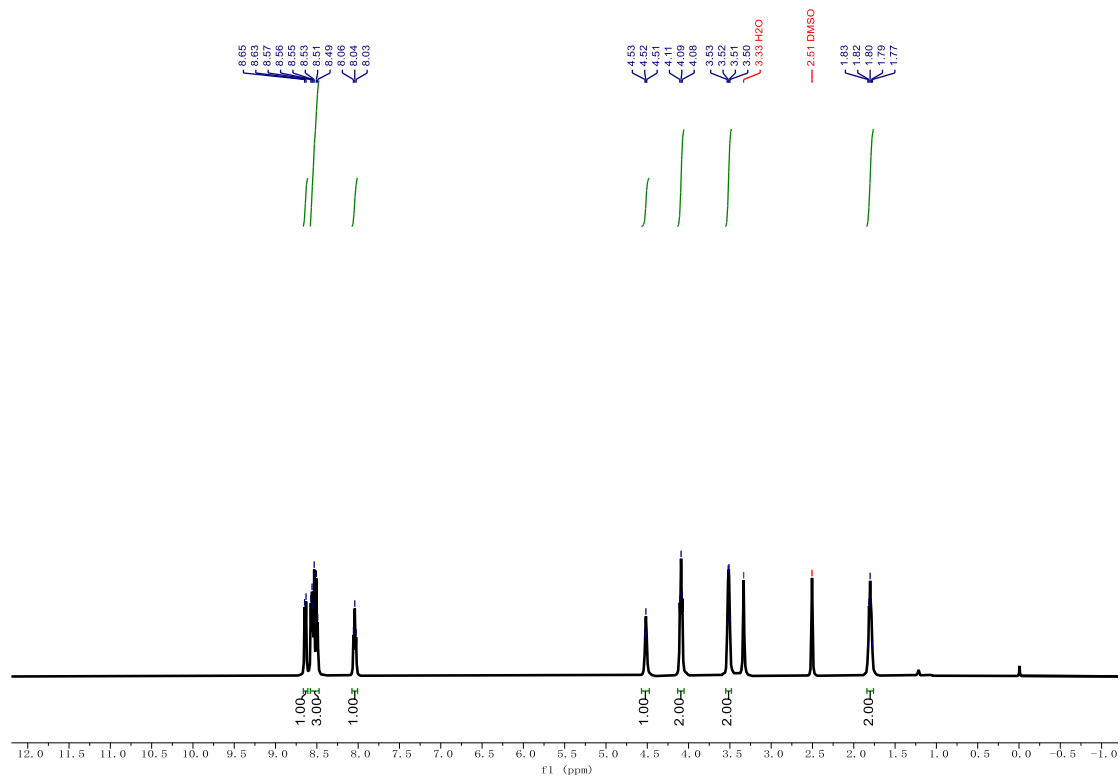

Fig. S1.  $^1\text{H}$  NMR spectrum of Compound 1.

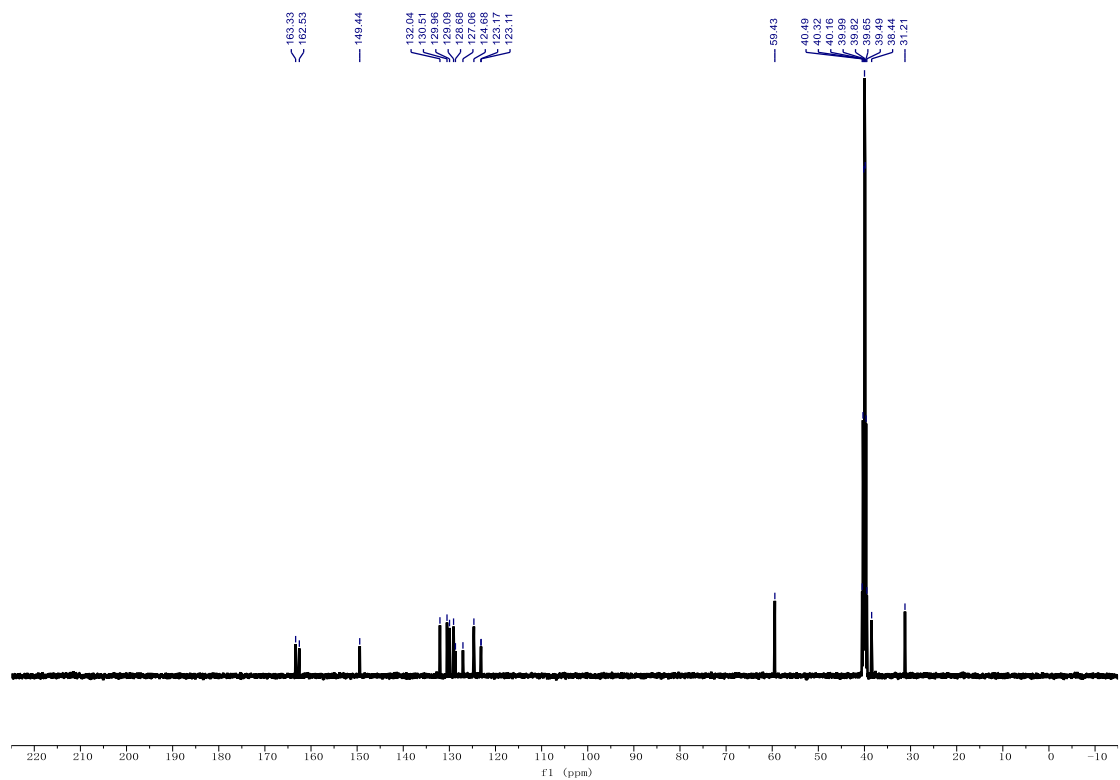

Fig. S2.  $^{13}\text{C}$  NMR spectrum of Compound 1.

1

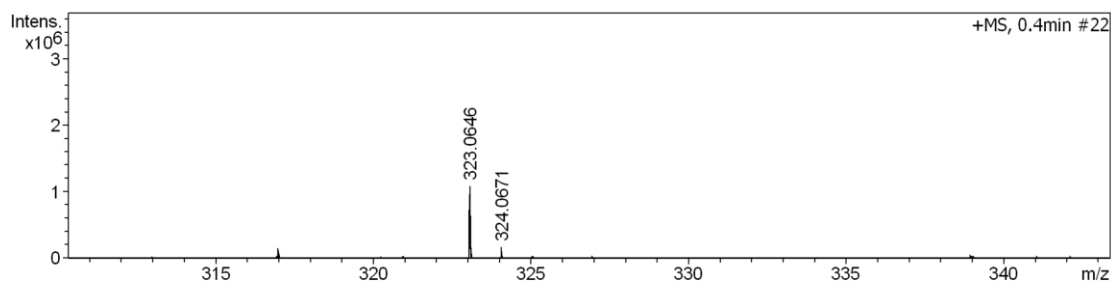

| # | m/z      | Res.  | S/N    | I       | I%    | FWHM   |
|---|----------|-------|--------|---------|-------|--------|
| 1 | 323.0646 | 26044 | 1513.9 | 1091136 | 100.0 | 0.0124 |
| 2 | 324.0671 | 17710 | 235.3  | 169736  | 15.6  | 0.0183 |
| 3 | 325.0689 | 15152 | 31.8   | 22928   | 2.1   | 0.0215 |

2

| Meas. m/z | # | Ion Formula                                                     | m/z      | err [ppm] | mSigma | Score | rdb    | e <sup>-</sup> Conf | N-Rule  |
|-----------|---|-----------------------------------------------------------------|----------|-----------|--------|-------|--------|---------------------|---------|
| 323.0646  | 1 | C <sub>15</sub> H <sub>12</sub> N <sub>2</sub> NaO <sub>5</sub> | 323.0638 | -2.5      | 10.2   | 1     | 100.00 | 10.5                | even ok |

3

**Fig. S3.** HR-MS spectrum of Compound **1**.

4 Synthesis of Compound **CMP**: 4-amino-1,8-naphthalicanhydride (426 mg, 2.0 mmol)  
 5 and 3-amino-1-propanol (300 mg, 4.0 mmol) were dissolved in ethanol (20 mL). The  
 6 reaction mixture was stirred and refluxed for 3 h under a nitrogen atmosphere, the  
 7 resulting mixture was evaporated to dryness. After the solvent was evaporated under  
 8 reduced pressure, the crude product was purified by silica gel column chromatography  
 9 using PE/EA (5:1, v/v) as eluent to get Compound **1** as yellow solid. <sup>1</sup>H NMR (500 MHz,  
 10 298 K, DMSO-*d*<sub>6</sub>) δ 8.62-8.60 (d, *J* = 8.5 Hz, 1H), 8.43-8.42 (d, *J* = 7.0 Hz, 1H), 8.20-  
 11 8.18 (d, *J* = 8.5 Hz, 1H), 7.66-7.63 (m, 1H), 7.43 (s, 2H), 6.86-8.84 (d, *J* = 8.0 Hz, 1H),  
 12 4.96-4.47 (m, 1H), 4.08-4.05 (m, 2H), 3.50-3.47 (m, 2H), 1.78-1.75 (m, 2H). <sup>13</sup>C NMR  
 13 (125 MHz, 298 K, DMSO-*d*<sub>6</sub>) δ 164.25, 163.41, 153.12, 134.37, 131.41, 130.11, 129.70,  
 14 124.40, 122.24, 119.80, 108.60, 108.04, 59.48, 37.45, 31.69. HR-MS (ESI): m/z calcd  
 15 for C<sub>15</sub>H<sub>14</sub>N<sub>2</sub>NaO<sub>3</sub> [M+Na]<sup>+</sup>: 293.0897; found: 293.0900.

16

17



1

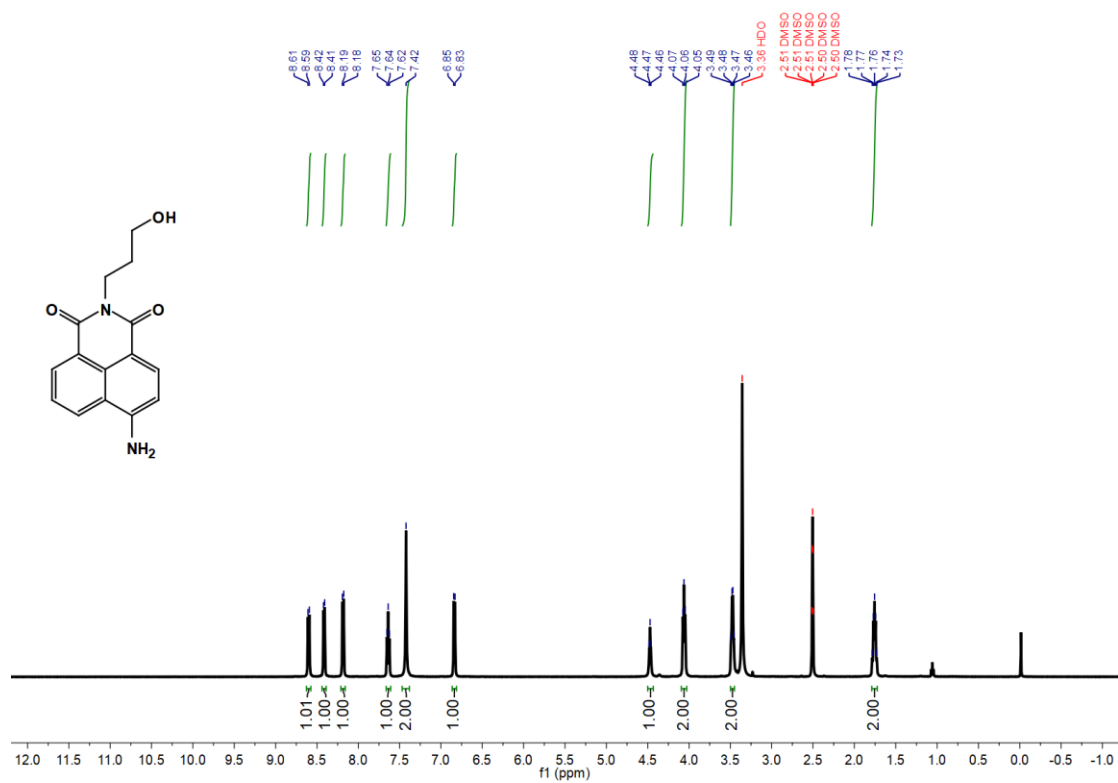

2

Fig. S4. <sup>1</sup>H NMR spectrum of Compound CMP.

3

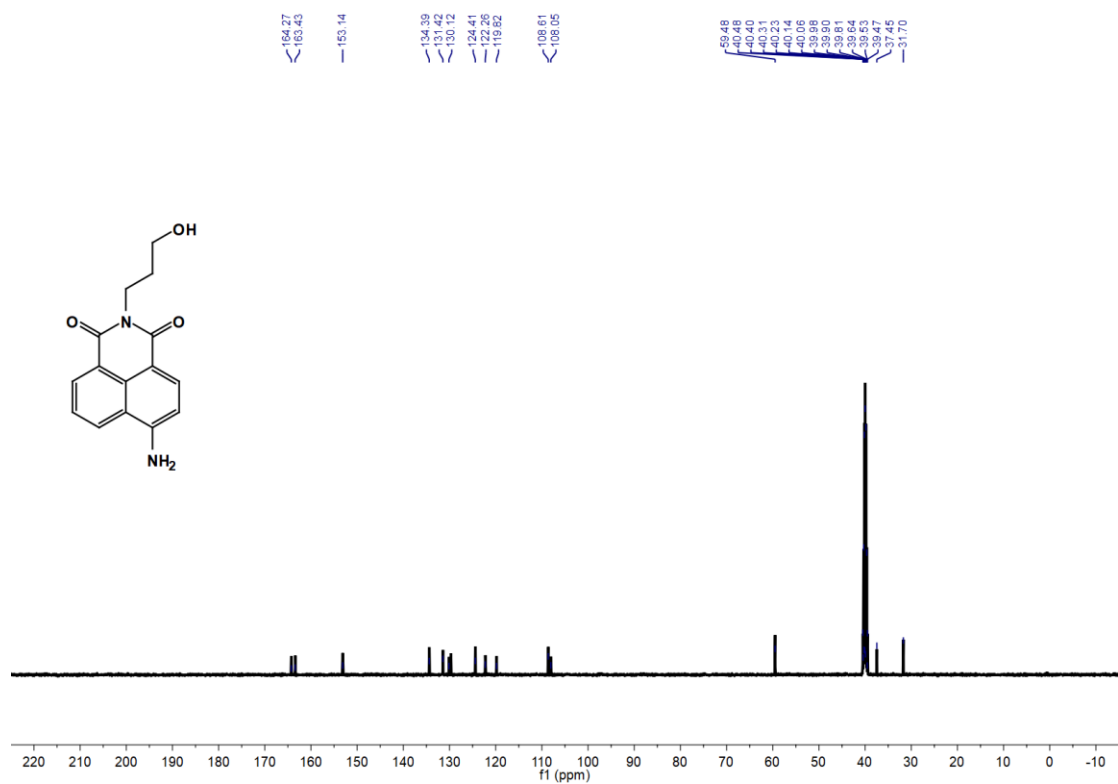

4

Fig. S5. <sup>13</sup>C NMR spectrum of Compound CMP.

5

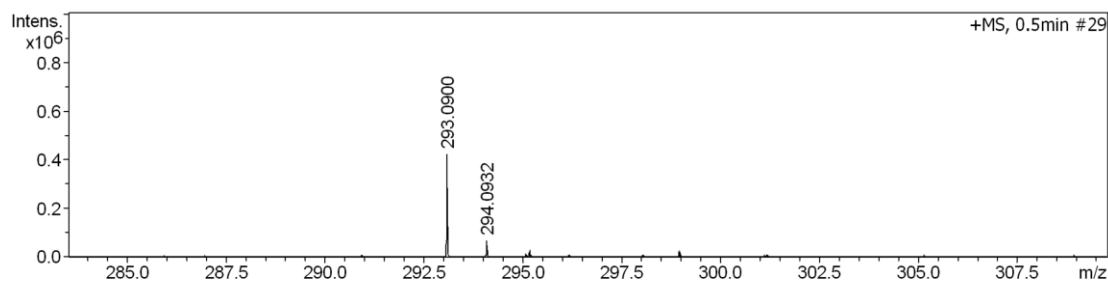

| # | m/z      | Res.  | S/N   | I      | I %   | FWHM   |
|---|----------|-------|-------|--------|-------|--------|
| 1 | 293.0900 | 17243 | 481.6 | 422992 | 100.0 | 0.0170 |
| 2 | 294.0932 | 15361 | 78.9  | 69296  | 16.4  | 0.0191 |
| 3 | 295.0956 | 13548 | 9.2   | 8056   | 1.9   | 0.0218 |

| Meas. m/z | # | Ion Formula                                                     | m/z      | err [ppm] | mSigma | Score  | rdb | e <sup>-</sup> Conf | N-Rule |
|-----------|---|-----------------------------------------------------------------|----------|-----------|--------|--------|-----|---------------------|--------|
| 293.0900  | 1 | C <sub>15</sub> H <sub>14</sub> N <sub>2</sub> NaO <sub>3</sub> | 293.0897 | -1.0      | 4.9    | 100.00 | 9.5 | even                | ok     |

1

2

**Fig. S6.** HR-MS spectrum of Compound **CMP**.

3 Synthesis of Compound **DMP**: 7-(diethylamino)-2-oxo-2H-chromene-3-

4 carbaldehyde (490 mg, 2 mmol) and 4-methylpyridine (279 mg, 3.0 mmol)

5 were dissolved in acetonitrile (20 mL). The reaction mixture was stirred

6 and refluxed for 8 h under nitrogen atmosphere, the resulting mixture was

7 evaporated under reduced pressure, the crude product was purified by silica

8 gel column chromatography using DCM/MeOH (200:1, v/v) as eluent to

9 get **DMP** as red solid. <sup>1</sup>H NMR (500 MHz, 298 K, DMSO-*d*<sub>6</sub>) δ 8.79-8.78

10 (d, *J* = 5.5 Hz, 2H), 8.24 (s, 1H), 8.16-8.14 (m, 2H), 7.83-7.81 (d, *J* = 13.5

11 Hz, 1H), 7.68-7.66 (d, *J* = 13.0 Hz, 1H), 7.55-7.54 (d, *J* = 8.0 Hz, 1H),

12 6.81-6.79 (m, 1H), 6.60-6.59 (d, *J* = 2.0 Hz, 1H), 4.23 (s, 3H), 3.51-3.47

13 (m, 4H), 1.16-1.14 (m, 6H). <sup>13</sup>C NMR (125 MHz, 298 K, DMSO-*d*<sub>6</sub>) δ

14 13C NMR (151 MHz, DMSO) δ 160.07, 156.76, 153.36, 152.40, 145.78,

15 145.25, 137.12, 131.20, 123.46, 123.08, 114.11, 110.49, 108.82, 96.68,

16 47.18, 44.84, 40.42, 40.28, 40.14, 40.00, 39.86, 39.72, 39.58, 12.86. HR-

17 MS (ESI): m/z calcd for C<sub>21</sub>H<sub>23</sub>N<sub>2</sub>O<sub>2</sub> [M-I]<sup>+</sup>: 335.1754; found: 335.1760.

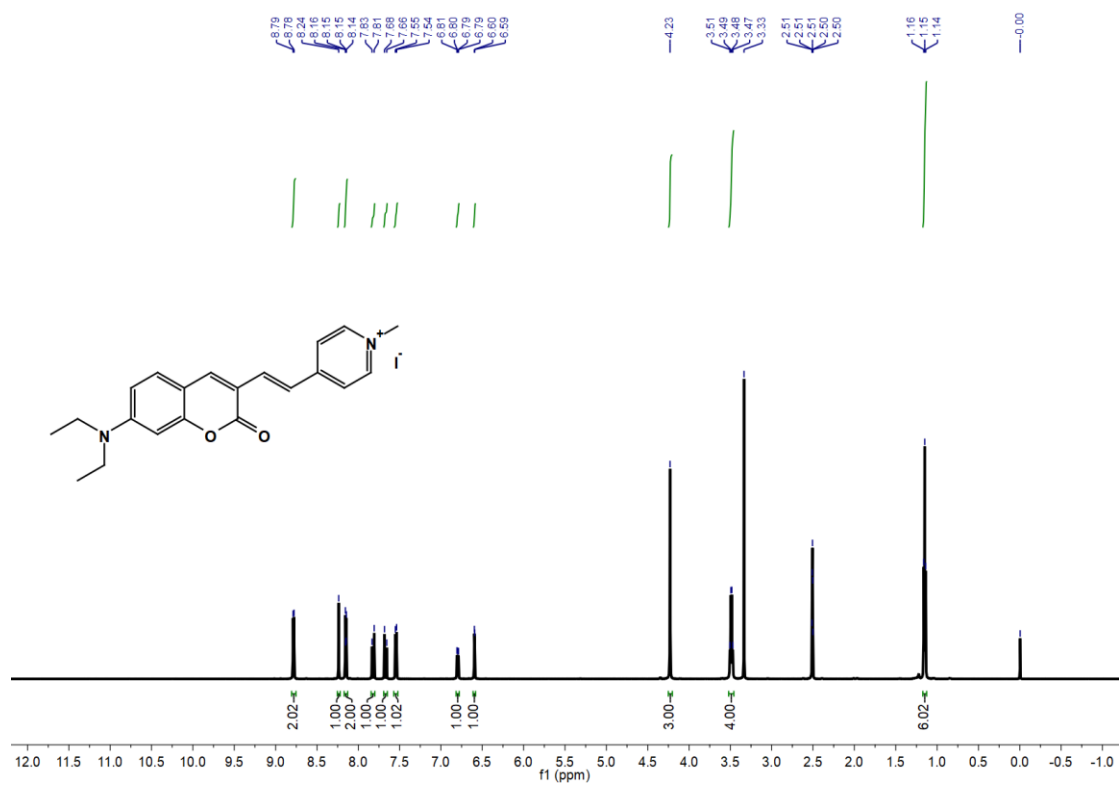

**Fig. S7.** <sup>1</sup>H NMR spectrum of Compound DMP.

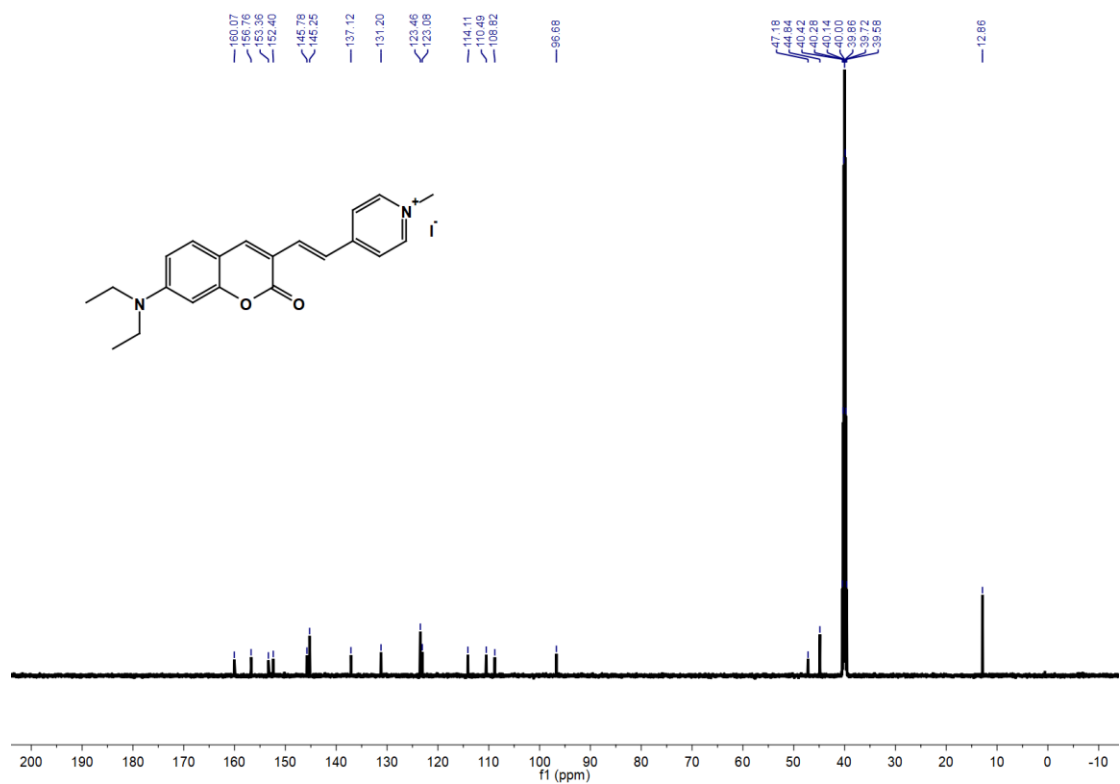

**Fig. S8.** <sup>13</sup>C NMR spectrum of Compound DMP.

1

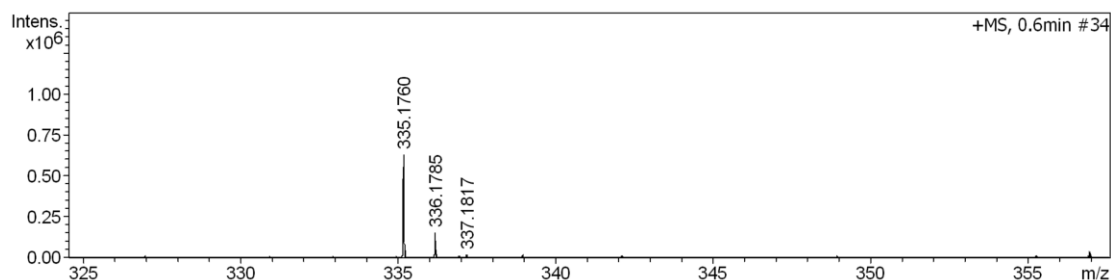

| # | m/z      | Res.  | S/N   | I      | I%    | FWHM   |
|---|----------|-------|-------|--------|-------|--------|
| 1 | 335.1760 | 20057 | 651.5 | 629128 | 100.0 | 0.0167 |
| 2 | 336.1785 | 18199 | 160.3 | 154664 | 24.6  | 0.0185 |
| 3 | 337.1817 | 12096 | 16.5  | 15864  | 2.5   | 0.0279 |

| Meas. m/z | # | Ion Formula                                                   | m/z      | err [ppm] | mSigma | Score | rdb    | e <sup>-</sup> Conf | N-Rule  |
|-----------|---|---------------------------------------------------------------|----------|-----------|--------|-------|--------|---------------------|---------|
| 335.1760  | 1 | C <sub>21</sub> H <sub>23</sub> N <sub>2</sub> O <sub>2</sub> | 335.1754 | -1.8      | 5.7    | 1     | 100.00 | 11.5                | even ok |

2

3

**Fig. S9.** HR-MS spectrum of Compound **DMP**.

4 Synthesis of Compound **2**: To a solution of compound **1** (300 mg, 1.0 mmol) in  
 5 dichloromethane (30 mL) at 0 °C, tribromophosphine (0.19 mL, 2.0 mmol) was added  
 6 dropwise. The resulting reaction mixture was warmed up to room temperature and  
 7 stirred for 6 h. Then, the mixture was diluted with dichloromethane (20 ml), and washed  
 8 three times with water (20 mL). The organic layer was separated and dried over  
 9 anhydrous Na<sub>2</sub>SO<sub>4</sub>. The solvent was removed by evaporation under reduced pressure,  
 10 and the purified by silica-gel column chromatography PE/EA (20:1, v/v) to afford  
 11 compound **2** as yellow solid. <sup>1</sup>H NMR (500 MHz, 298 K, DMSO-*d*<sub>6</sub>) δ 8.64-8.62 (d, *J*  
 12 = 10.0 Hz, 1H), 8.57-8.47 (m, 3H), 8.05-8.02 (m, 1H), 4.12-4.07 (m, 4H), 2.01-1.94 (m,  
 13 2H). <sup>13</sup>C NMR (125 MHz, 298 K, DMSO-*d*<sub>6</sub>) δ 170.76, 163.41, 162.61, 149.46, 132.07,  
 14 130.51, 129.99, 129.14, 128.69, 126.98, 124.68, 123.10, 62.58, 40.49, 40.32, 40.24,  
 15 40.16, 40.08, 39.99, 39.91, 39.82, 39.66, 39.49, 37.76, 27.12, 21.07. HR-MS (ESI): m/z  
 16 calcd for C<sub>15</sub>H<sub>11</sub>BrN<sub>2</sub>NaO<sub>4</sub> [M+Na]<sup>+</sup>: 384.9794; found: 384.9777.

17

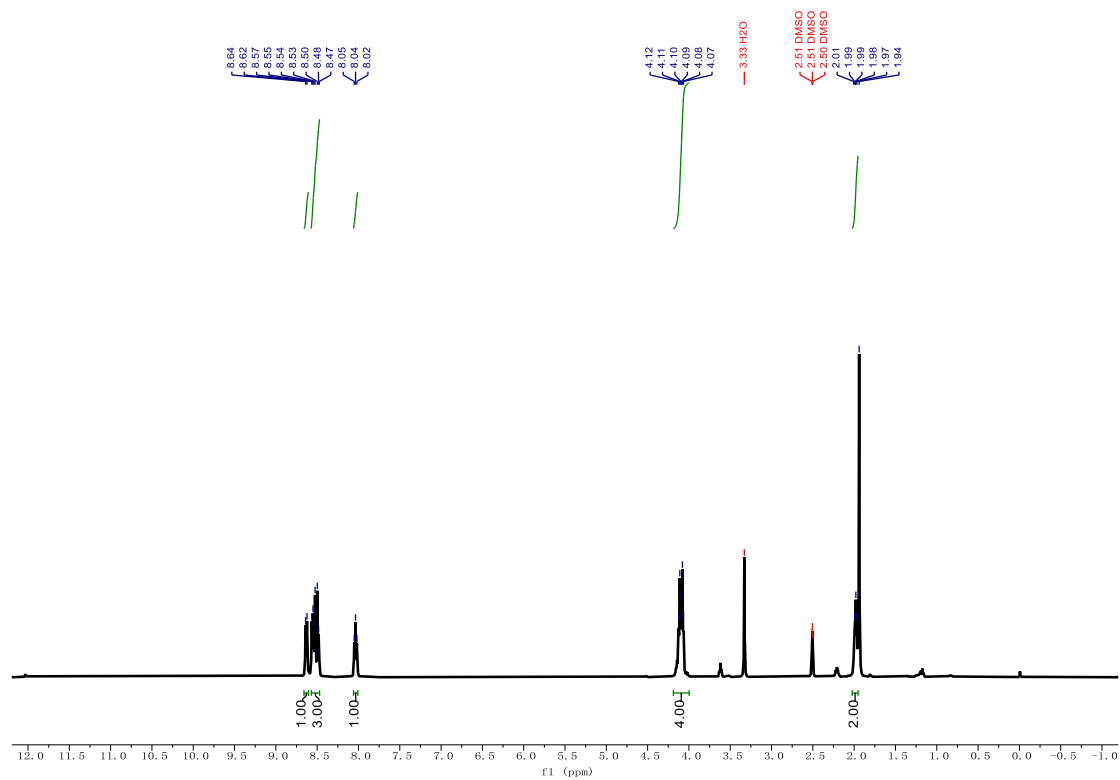

1

2

**Fig. S10.** <sup>1</sup>H NMR spectrum of Compound 2.

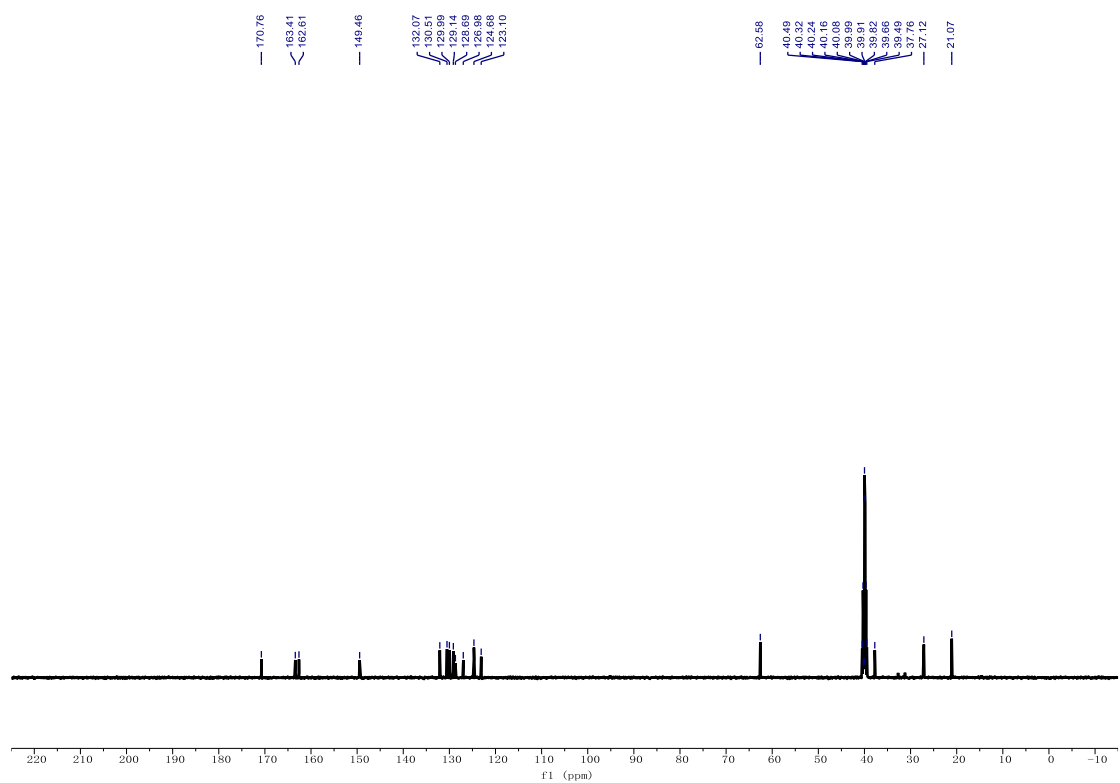

3

4

**Fig. S11.** <sup>13</sup>C NMR spectrum of Compound 2.

1

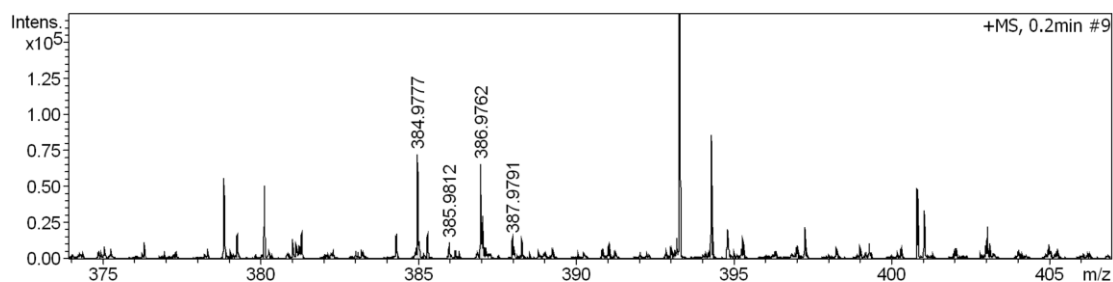

| # | m/z      | Res.  | S/N  | I     | I %   | FWHM   |
|---|----------|-------|------|-------|-------|--------|
| 1 | 384.9777 | 17520 | 75.2 | 72016 | 100.0 | 0.0220 |
| 2 | 385.9812 | 14370 | 11.6 | 11184 | 15.5  | 0.0269 |
| 3 | 386.9762 | 17159 | 67.8 | 65408 | 90.8  | 0.0226 |
| 4 | 387.9791 | 20845 | 14.5 | 14028 | 19.5  | 0.0186 |

| Meas. m/z | # | Ion Formula                                                       | m/z      | err [ppm] | mSigma | Score | rdb   | e <sup>-</sup> Conf | N-Rule  |
|-----------|---|-------------------------------------------------------------------|----------|-----------|--------|-------|-------|---------------------|---------|
| 384.9777  | 1 | C <sub>15</sub> H <sub>11</sub> BrN <sub>2</sub> NaO <sub>4</sub> | 384.9794 | 4.6       | 42.2   | 2     | 58.24 | 10.5                | even ok |

2

3

**Fig. S12.** HR-MS spectrum of Compound **2**.

4 Synthesis of Compound **3**: Compound **2** (363 mg, 1.0 mmol) and NaI (450 mg, 4 mmol)

5 were dissolved in tetrahydrofuran (50 mL). The reaction mixture was stirred and

6 refluxed for 12 h under a nitrogen atmosphere, the resulting mixture was evaporated to

7 dryness. The solvent was evaporated under reduced pressure to get Compound **3** as

8 yellow solid. <sup>1</sup>H NMR (500 MHz, 298 K, DMSO-*d*<sub>6</sub>) δ 8.70-8.67 (m, 1H), 8.63- 8.58

9 (m, 2H), 8.56-8.54 (m, 1H), 8.11-8.07 (m, 1H), 4.15-4.06 (m, 4H), 2.01-1.96 (m, 2H).

10 <sup>13</sup>C NMR (125 MHz, 298 K, DMSO-*d*<sub>6</sub>) δ 163.27, 162.76, 146.08, 136.61, 134.44,

11 134.24, 134.12, 131.15, 130.15, 129.97, 129.88, 129.61, 124.43, 123.13, 123.03,

12 122.99, 41.36, 40.88, 40.48, 40.31, 40.24, 40.14, 39.98, 39.90, 39.81, 39.72, 39.64,

13 39.47, 31.96, 5.01. R-MS (ESI): m/z calcd for C<sub>15</sub>H<sub>11</sub>IN<sub>2</sub>NaO<sub>4</sub> [M+Na]<sup>+</sup>: 432.9656;

14 found: 432.9650.

15

16

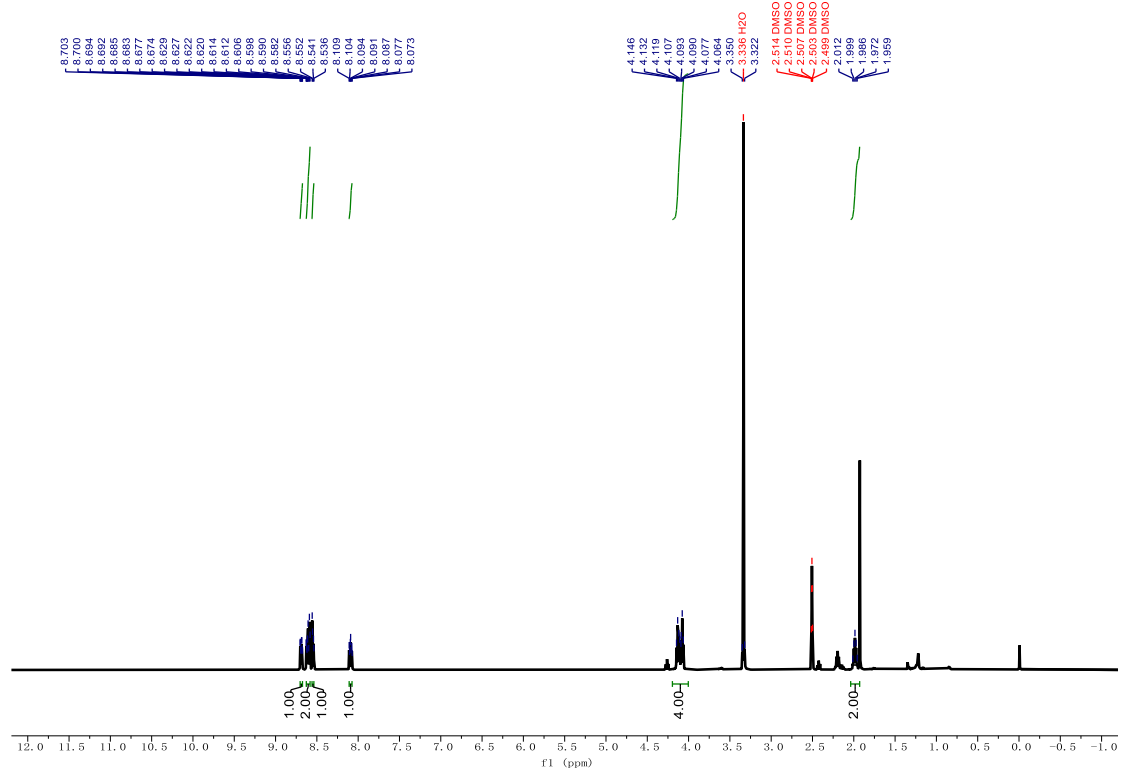

1  
2  
3

**Fig. S13.**  $^1\text{H}$  NMR spectrum of Compound 3.

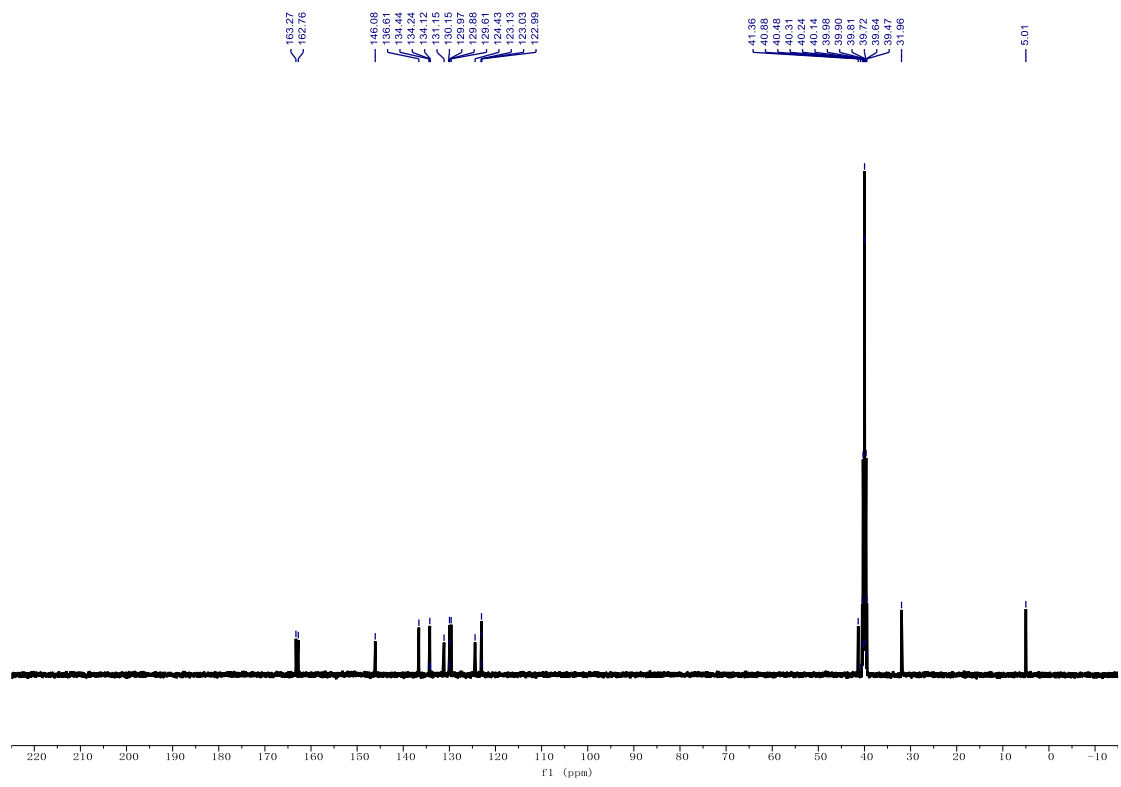

4  
5

**Fig. S14.**  $^{13}\text{C}$  NMR spectrum of Compound 3.

1

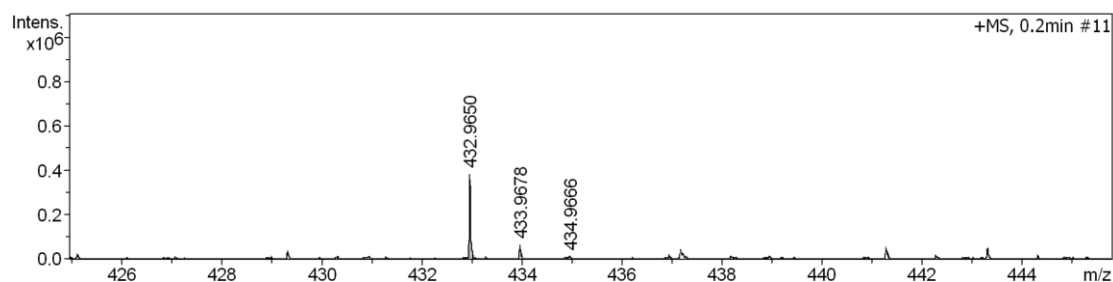

| # | m/z      | Res.  | S/N   | I      | I %   | FWHM   |
|---|----------|-------|-------|--------|-------|--------|
| 1 | 432.9650 | 21043 | 265.0 | 384300 | 100.0 | 0.0206 |
| 2 | 433.9678 | 15381 | 45.0  | 65292  | 17.0  | 0.0282 |
| 3 | 434.9666 | 12806 | 8.5   | 12360  | 3.2   | 0.0340 |

2

| Meas. m/z | # | Ion Formula                                                     | m/z      | err [ppm] | mSigma | Score | rdb    | e <sup>-</sup> Conf | N-Rule     |
|-----------|---|-----------------------------------------------------------------|----------|-----------|--------|-------|--------|---------------------|------------|
| 432.9650  | 1 | C <sub>15</sub> H <sub>11</sub> N <sub>2</sub> NaO <sub>4</sub> | 432.9656 | 1.3       | 5.9    | 1     | 100.00 | 10.5                | even<br>ok |

3

**Fig. S15.** HR-MS spectrum of Compound 3.

4 Synthesis of Compound 4: Compound 3 (1.0 g, 2.5 mmol) and 4-methylpyridine (279  
5 mg, 3.0 mmol) were dissolved in acetonitrile (20 mL). The reaction mixture was stirred  
6 and refluxed for 8 h under a nitrogen atmosphere, the resulting mixture was evaporated  
7 to dryness. After the solvent was evaporated under reduced pressure, the crude product  
8 was purified by silica gel column chromatography using DCM/MeOH (200:1, v/v) as  
9 eluent to get Compound 4 as brown solid. <sup>1</sup>H NMR (500 MHz, 298 K, DMSO-*d*<sub>6</sub>) δ  
10 9.50 (s, 1H), 8.95-8.94 (m, 3H), 8.81-8.79 (d, *J* = 10.0 Hz, 1H), 8.69-8.67 (d, *J* = 10.0  
11 Hz, 1H), 8.10-8.07 (m, 1H), 8.00-7.99 (d, *J* = 5.0 Hz, 2H), 4.67-4.63 (m, 2H), 4.16-  
12 4.14 (m, 2H), 2.60 (s, 1H), 2.37-2.31 (m, 2H). <sup>13</sup>C NMR (125 MHz, 298 K, DMSO-*d*<sub>6</sub>)  
13 δ 163.58, 163.10, 159.32, 146.25, 144.26, 136.81, 134.38, 131.31, 130.18, 130.07,  
14 129.78, 128.93, 128.79, 124.63, 123.20, 58.43, 40.49, 40.33, 40.25, 40.16, 39.99, 39.92,  
15 39.83, 39.73, 39.66, 39.49, 37.41, 30.07, 21.86. HR-MS (ESI): m/z calcd for  
16 C<sub>21</sub>H<sub>18</sub>N<sub>3</sub>O<sub>4</sub> [M]<sup>+</sup>: 376.1292; found: 376.1294.

17



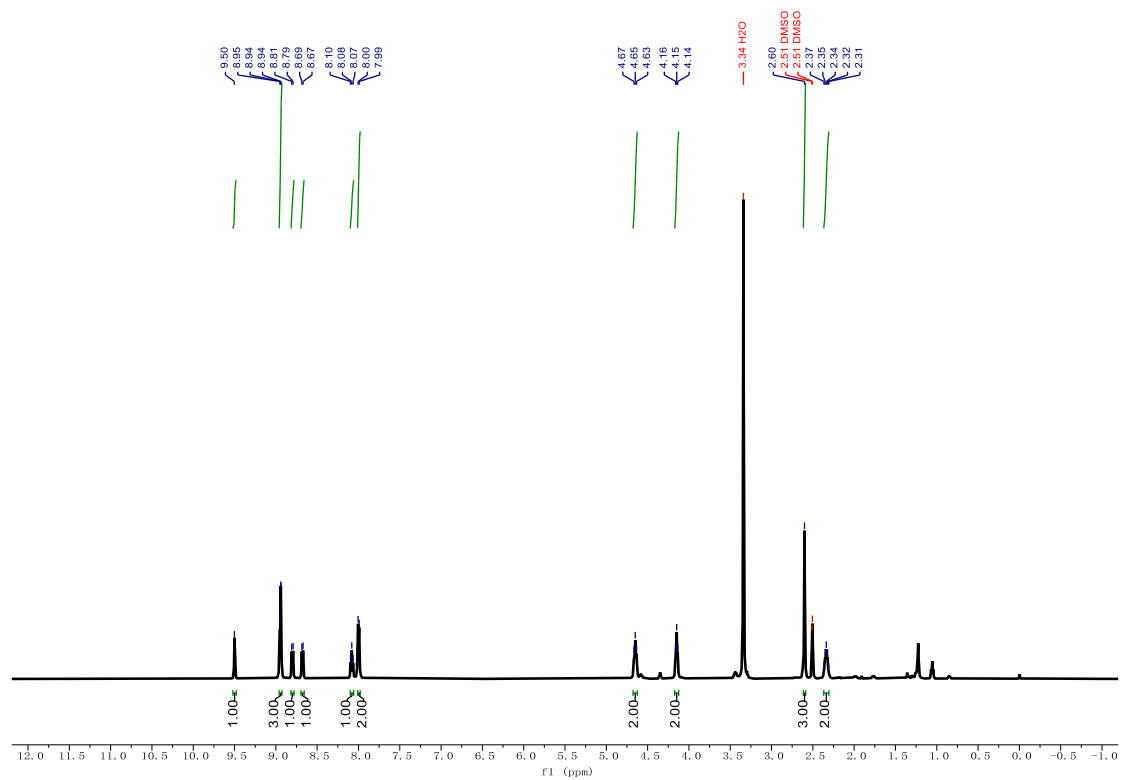

1

2

**Fig. S16.**  $^1\text{H}$  NMR spectrum of Compound 4.

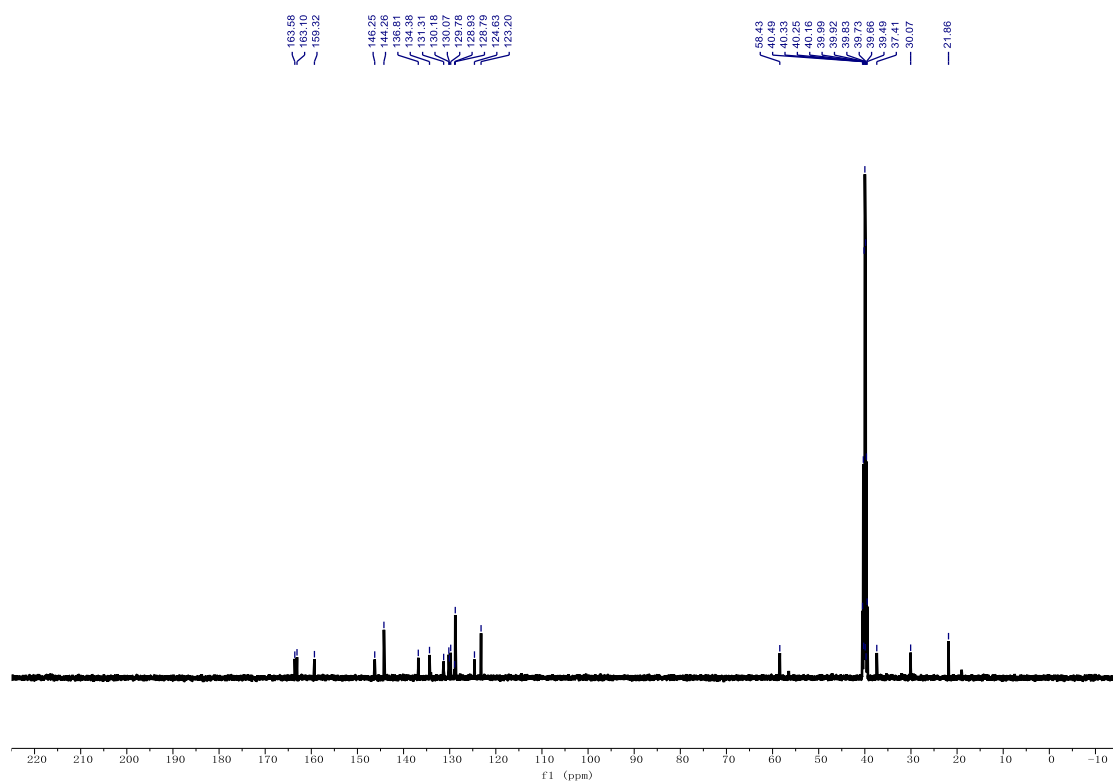

3

4

**Fig. S17.**  $^{13}\text{C}$  NMR spectrum of Compound 4.

1

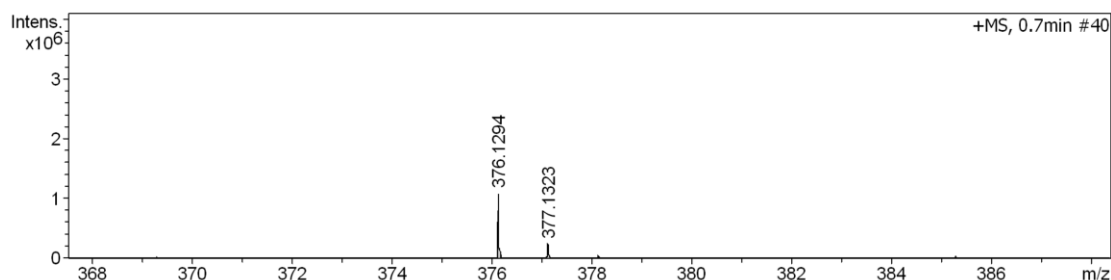

| # | m/z      | Res.  | S/N    | I       | I %   | FWHM   |
|---|----------|-------|--------|---------|-------|--------|
| 1 | 376.1294 | 24327 | 1362.4 | 1082584 | 100.0 | 0.0155 |
| 2 | 377.1323 | 16876 | 293.4  | 233356  | 21.6  | 0.0223 |
| 3 | 378.1346 | 17917 | 49.9   | 39688   | 3.7   | 0.0211 |

| Meas. m/z | # | Ion Formula | m/z      | err [ppm] | mSigma | Score | rdb    | e <sup>-</sup> Conf | N-Rule  |
|-----------|---|-------------|----------|-----------|--------|-------|--------|---------------------|---------|
| 376.1294  | 1 | C21H18N3O4  | 376.1292 | -0.5      | 13.1   | 1     | 100.00 | 14.5                | even ok |

2

3

**Fig. S18.** HR-MS spectrum of Compound 4.

4

Synthesis of Compound **IFRP**: Compound 4 (753 mg, 2 mmol) and 7-(diethylamino)-

5

2-oxochromene-3-carbaldehyde (589 mg, 2.4 mmol) were dissolved in ethanol (50 mL).

6

The reaction mixture was stirred and refluxed for 8 h under a nitrogen atmosphere, the

7

resulting mixture was evaporated to dryness. After the solvent was evaporated under

8

reduced pressure, the crude product was purified by silica gel column chromatography

9

using DCM/MeOH (100:1, v/v) as eluent to get compound **IFRP** as purple solid. <sup>1</sup>H

10

NMR (500 MHz, 298 K, DMSO-*d*<sub>6</sub>) δ 8.87 (s, 2H), 8.67-8.55 (m, 3H), 8.33 (s, 1H),

11

8.17-8.08 (m, 4H), 7.77-7.58 (m, 2H), 7.50-7.49 (d, *J* = 9.0 Hz, 1H), 6.77-6.75 (d, *J* =

12

9.0 Hz, 1H), 6.54 (s, 1H), 4.58-4.57 (d, *J* = 7.5 Hz, 2H), 4.14 (s, 2H), 3.47-3.46 (d, *J* =

13

6.5 Hz, 4H), 2.34 (s, 2H), 1.15-1.14 (d, *J* = 7.0 Hz, 6H). <sup>13</sup>C NMR (125 MHz, 298 K,

14

DMSO-*d*<sub>6</sub>) δ 163.48, 162.99, 159.95, 159.32, 156.71, 156.36, 153.82, 152.41, 146.15,

15

146.12, 145.76, 144.45, 144.25, 137.38, 136.78, 134.35, 131.25, 131.16, 130.13,

16

129.95, 129.74, 128.79, 124.47, 124.18, 123.70, 123.13, 123.05, 122.91, 114.00, 110.48,

1 108.77, 96.60, 44.85, 40.50, 40.34, 40.17, 40.00, 39.84, 39.67, 39.50, 37.48, 37.39,  
2 30.07, 29.93, 21.87, 12.86. HR-MS (ESI): m/z calcd for C<sub>35</sub>H<sub>31</sub>N<sub>4</sub>O<sub>6</sub> [M]<sup>+</sup>: 603.2238;  
3 found: 603.2241.

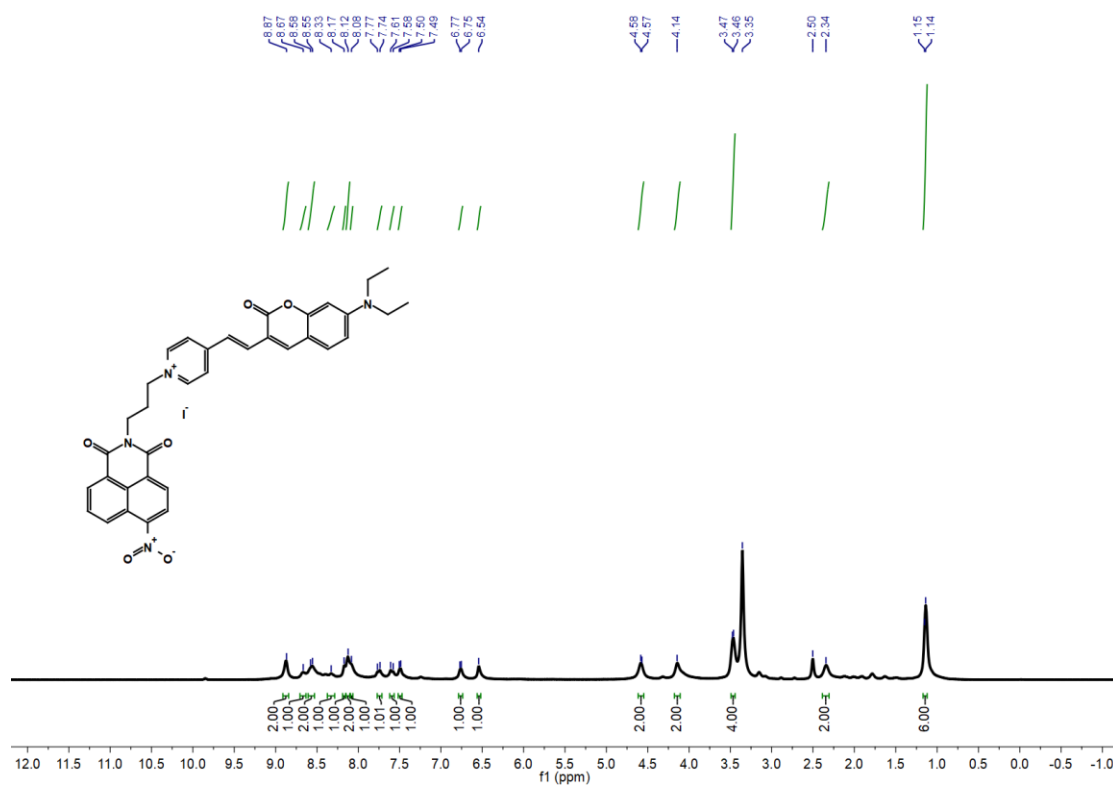

Fig. S19. <sup>1</sup>H NMR spectrum of IFRP.

1

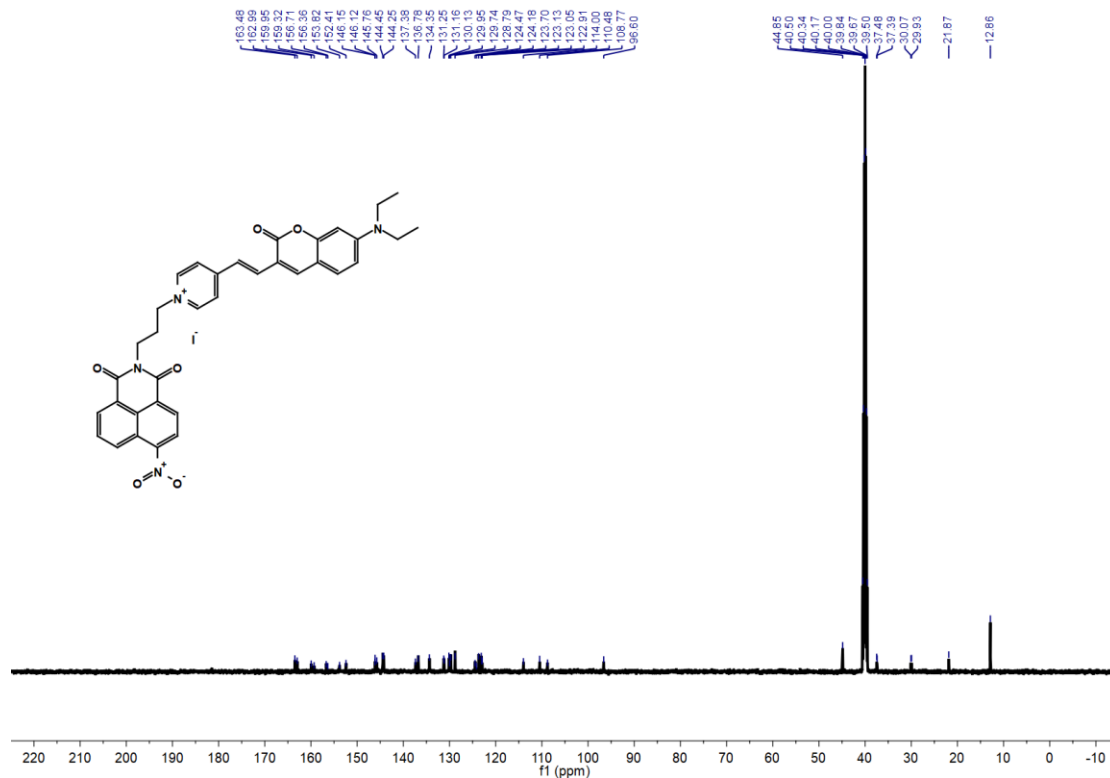

2

3

Fig. S20. <sup>13</sup>C NMR spectrum of IFRP.

4

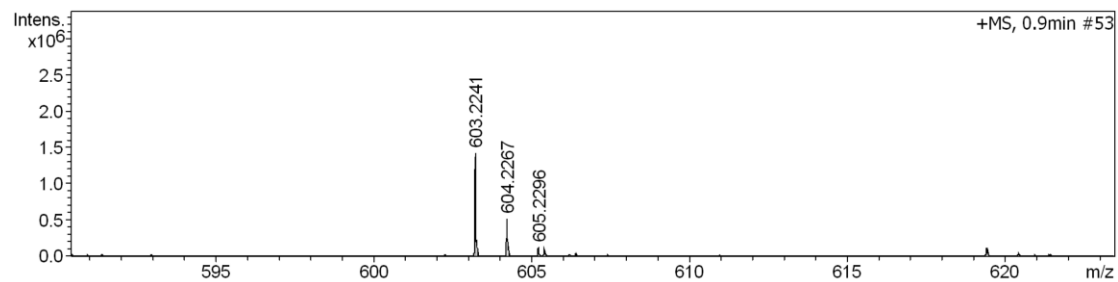

| # | m/z      | Res.  | S/N    | I       | I %   | FWHM   |
|---|----------|-------|--------|---------|-------|--------|
| 1 | 603.2241 | 24702 | 1623.2 | 1419200 | 100.0 | 0.0244 |
| 2 | 604.2267 | 19920 | 587.8  | 514180  | 36.2  | 0.0303 |
| 3 | 605.2296 | 16440 | 132.0  | 115508  | 8.1   | 0.0368 |

5

| Meas. m/z | # | Ion Formula                                                   | m/z      | err [ppm] | mSigma | Score | rdb    | e <sup>-</sup> Conf | N-Rule     |
|-----------|---|---------------------------------------------------------------|----------|-----------|--------|-------|--------|---------------------|------------|
| 603.2241  | 1 | C <sub>35</sub> H <sub>31</sub> N <sub>4</sub> O <sub>6</sub> | 603.2238 | -0.4      | 18.8   | 2     | 100.00 | 22.5                | even<br>ok |

6

Fig. S21. HR-MS spectrum of IFRP.

7

1

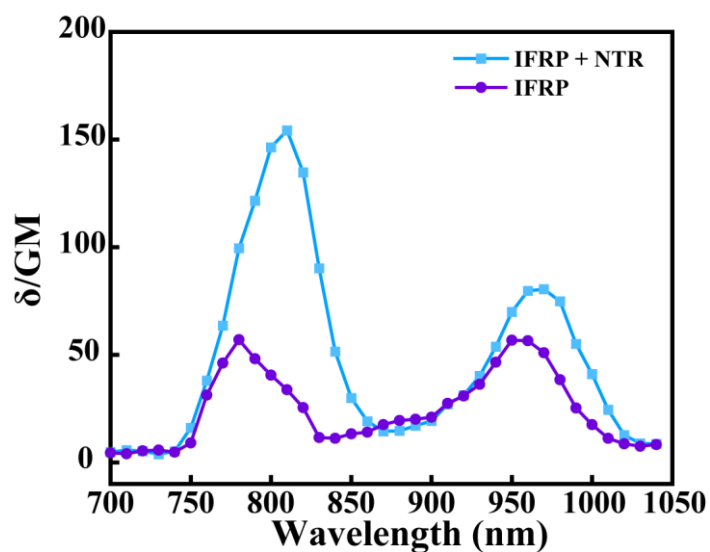

2

3 **Fig. S22.** Two-photon fluorescence spectra of probe **IFRP** before and after addition of NTR.

4

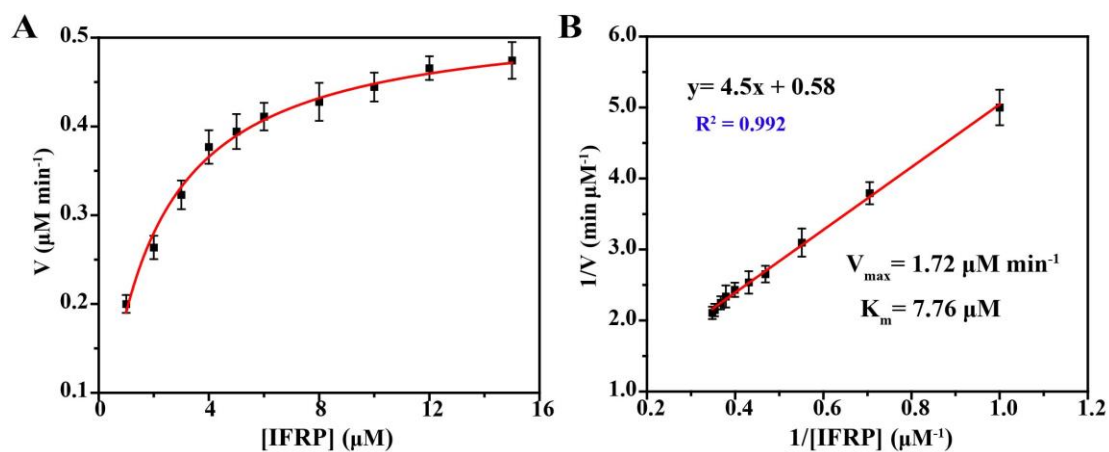

5

6 **Fig. S23.** (A) Michaelis-Menten plot for enzymatic reaction of 10 mg/mL NTR with **IFPR** at  
7 various concentrations (1, 2, 3, 4, 5, 6, 8, 10, 15  $\mu M$ ). (B) Lineweaver-Burk plot of the enzyme-  
8 catalyzed reaction.

9

10

11

1 **Table S1.** Comparison of the sensing performances of our probe to the reported  
 2 fluorescent probes for NTR.

| Structure of probes                                                                 | $\lambda_{\text{ex}} / \lambda_{\text{em}}$ (nm) | Linear Range<br>( $\mu\text{g mL}^{-1}$ ) | LOD (ng<br>$\text{mL}^{-1}$ ) | Km<br>( $\mu\text{M}$ ) | Ref.         |
|-------------------------------------------------------------------------------------|--------------------------------------------------|-------------------------------------------|-------------------------------|-------------------------|--------------|
| 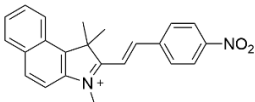   | 495 / 595                                        | 0 - 10                                    | 2.2                           | 12.67                   | S1           |
|    | 700 / 740                                        | 0 - 2                                     | 43                            | 25.9                    | S2           |
|    | 760 / 595                                        | 0 - 10                                    | 0.142                         | 71.77                   | S3           |
|   | 670 / 730                                        | 0 - 5                                     | 2.5                           | 72.6                    | S4           |
|  | 450 / 580                                        | 0 - 20                                    | 26                            | 46.82                   | S5           |
|  | 561 / 624                                        | 0.05 – 0.3                                | 0.79                          | 35.07                   | S6           |
|  | 548 / 603                                        | 0 - 50                                    | 562                           | -                       | S7           |
|  | 490 / 555                                        | 0 - 20                                    | 153                           | -                       | S7           |
|  | 800 / 640,<br>515                                | 1.0 – 9.0                                 | 250                           | 7.76                    | This<br>work |

1

2

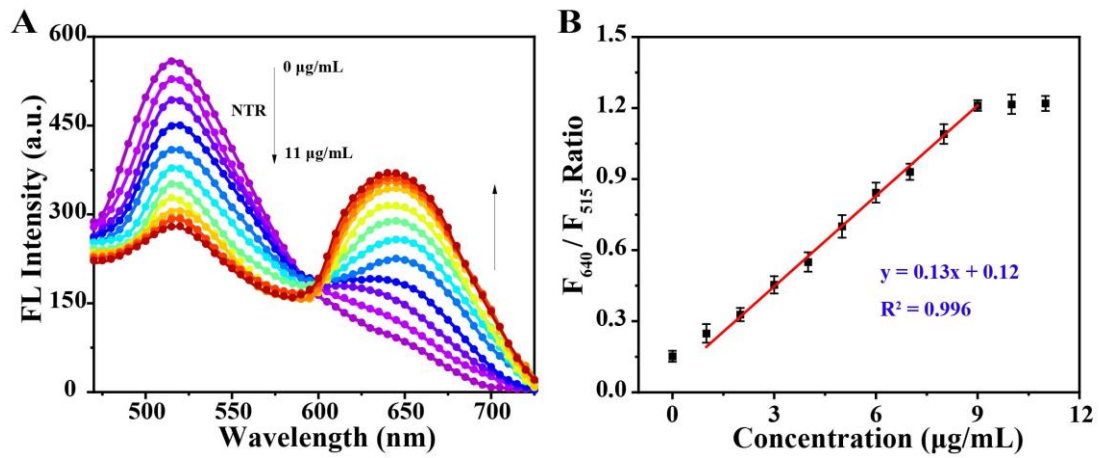

3

4 **Fig. S24.** (A) Two-photon fluorescence responses of **IFRP** to different concentrations of **NTR**  
5 (0-11 µg mL<sup>-1</sup>) in cell lysates. (B) Corresponding linear relationship of the fluorescence  
6 intensity ratio  $F_{640}/F_{515}$  ( $F_{515}$ : 470-550 nm,  $F_{640}$ : 600-700 nm) versus the concentration of **NTR**.

7

8

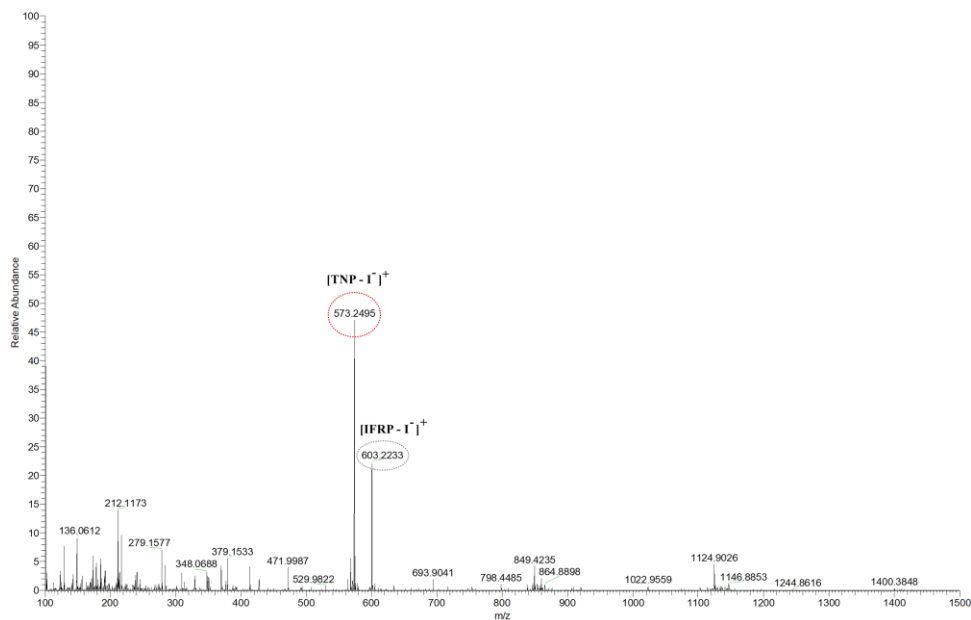

9

10 **Fig. S25.** HR-MS of probe **IFRP** after interacted with **NTR**.

11

12

1

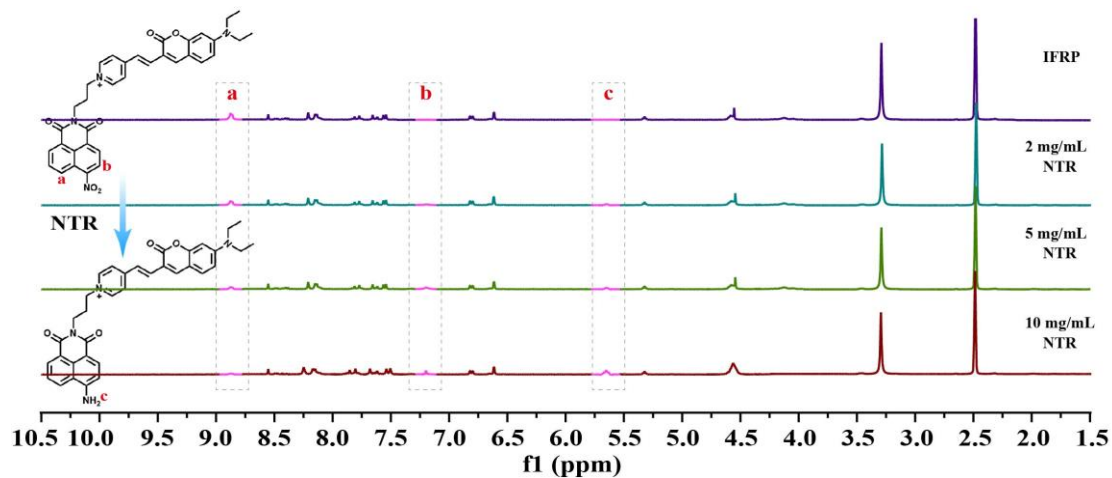

2

3 **Fig. S26.** <sup>1</sup>H NMR spectrum of **IFRP** (5 mM) upon addition of NTR (0-10 mg/mL).

4

5

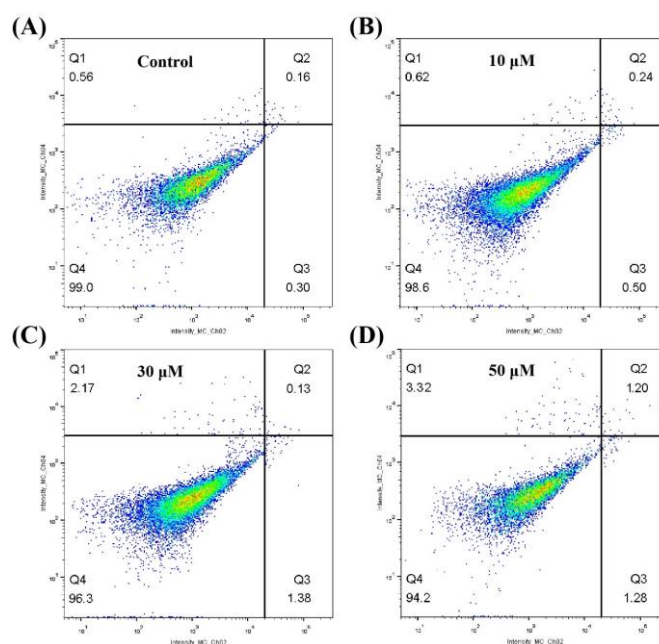

6

7 **Fig. S27.** The apoptosis assay of neurons incubated with probe **IFRP** under different  
8 concentrations (A) 0 μM, (B) 10 μM, (C) 30 μM, and (D) 50 μM for 24 h. Q1, Q2, Q3, and Q4  
9 represent the regions of dead neurons, late apoptotic neurons, early apoptotic neurons, and  
10 normal neurons, respectively.



1

2

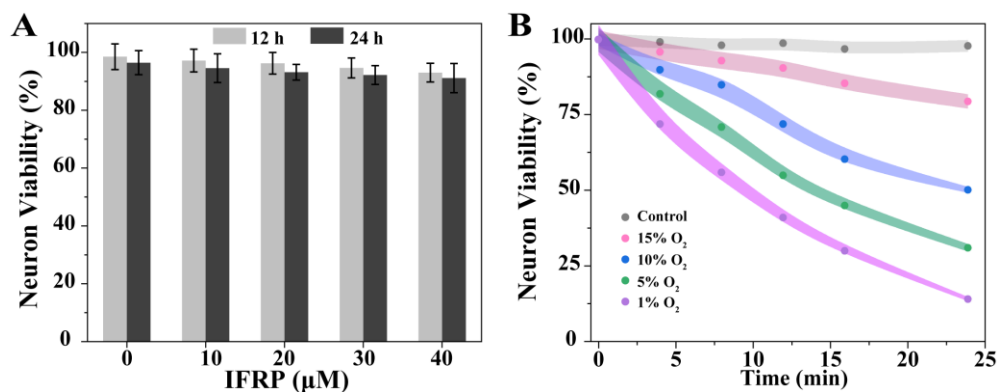

3

4 **Fig. S28.** (A) The MTT assay for neurons upon incubation with **IFRP** at different concentrations  
5 (0, 10, 20, 30, and 40 μM) after 12 h and 24 h, respectively. (B) Summarized data of neuron  
6 viability stimulated by various concentrations of O<sub>2</sub> (20% O<sub>2</sub>, 15% O<sub>2</sub>, 10% O<sub>2</sub>, 5% O<sub>2</sub> and 1%  
7 O<sub>2</sub>) stimulation for different times. Error bars, n = 10, S.D.

8

9

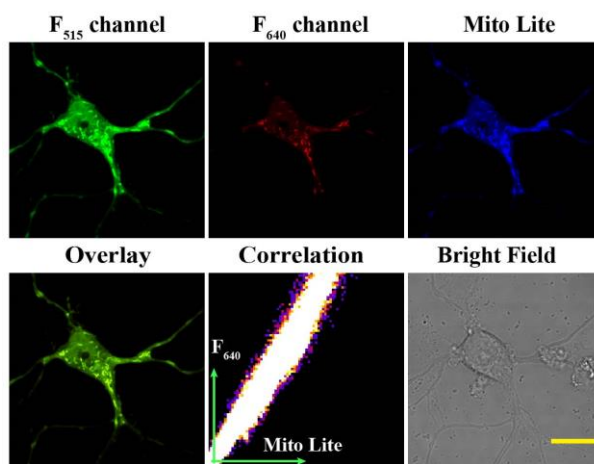

10

11 **Fig. S29.** Fluorescence images of neurons co-incubated with **IFRP** and MitoLite blue FX490.  
12 The images of **IFRP** were obtained under 800 nm excitation and 470-550 nm collection for the  
13 F<sub>515</sub> channel and 600-700 nm for the F<sub>640</sub> channel. MitoLite blue FX490 was excited using a  
14 405 nm laser, and emission signals were collected within the 420-490 nm wavelength range.

1

2

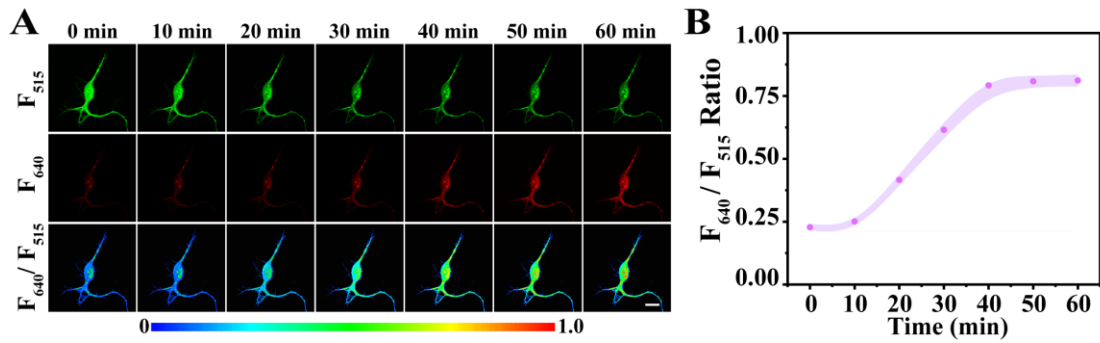

3

4 **Fig. S30.** (A) Confocal microscopy imaging of neurons after hypoxic stimulation at different  
 5 time (0, 10, 20, 30, 40, 50 and 60 min). (B) Quantification of the intensity ratio ( $F_{640}/F_{515}$ ) after  
 6 hypoxic stimulation at different times. Scale bar: 30  $\mu\text{m}$ .

7

8

9

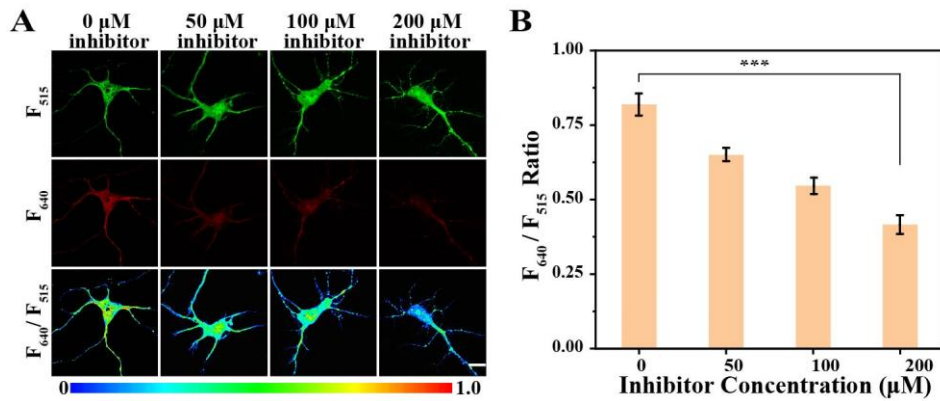

10

11 **Fig. S31.** Confocal microscopy imaging of IFRP (5  $\mu\text{M}$ ) in neurons under hypoxia (1%  $\text{O}_2$ )  
 12 stimulation with the presence of different concentrations dicoumarin (0, 50, 100, 200  $\mu\text{M}$ ).  
 13 Scale bar: 30  $\mu\text{m}$ .

14

15

16

17

1

2

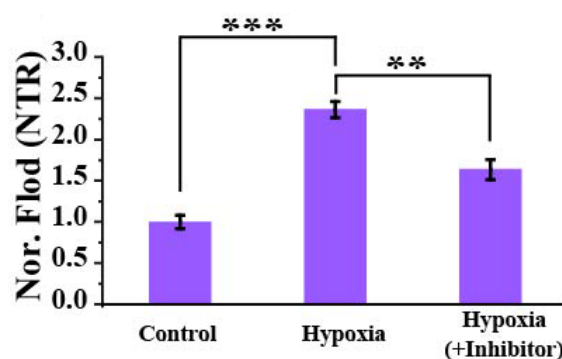

3

4 **Fig. S32.** The relative mRNA of NTR in neurons under normoxia or hypoxic condition with or  
5 without the presence of dicoumarin (n = 10; \*\*: p < 0.01; \*\*\*: p < 0.001).

6

7

#### 8 **References:**

9 S1. Y.-X. Fu, W.-Y. Guo, N. Wang, Y.-J. Dai, Z.-Y. Zhang, X.-L. Sun, W.-C. Yang and  
10 G.-F. Yang, *Anal. Chem.*, 2022, **94**, 17692-17699.

11 S2. H.-S. Wang, X.-F. Zhang, H. Dong, Q. Chen, X.-Q. Cao and S.-L. Shen, *Anal. Chim.*  
12 *Acta*, 2022, **1221**, 340107.

13 S3. C. Yu, S. Wang, C. Xu, Y. Ding, G. Zhang, N. Yang, Q. Wu, Q. Xiao, L. Wang, B.  
14 Fang, C. Pu, J. Ge, L. Gao, L. Li and S. Q. Yao, *Adv. Healthcare Mater.*, 2022, **11**,  
15 2200400.

16 S4. S. Zhang, H. Chen, L. Wang, X. Qin, B.-P. Jiang, S.-C. Ji, X.-C. Shen and H. Liang,  
17 *Angew. Chem. Int. Ed.*, 2022, **61**, e202107076.

18 S5. Y. Wang, L. Zhang, Y. Huang, X. Wang, L. Zhang and L. Chen, *Sensors and*  
19 *Actuators B: Chemical*, 2020, **310**, 127755.

20 S6. R. Peng, J. Yuan, D. Cheng, T. Ren, F. Jin, R. Yang, L. Yuan and X. Zhang, *Anal.*  
21 *Chem.*, 2019, **91**, 15974-15981.

22 S7. B. Zhang, H. Chen, L. Shi, R. Guo, Y. Wang, Y. Zheng, R. Bai, Y. Gao, B. Liu and  
23 X. Zhang, *ACS Sens.*, 2024, **9**, 4560-4567.
